# Supplementary material for: Risk factors of perioperative mortality from complicated peptic ulcer disease in Africa: systematic review and meta-analysis
Source: PubMed Central journal article supplement — BMJ Open Gastroenterol. 2020 Feb 17;7(1):e000350. doi: 10.1136/bmjgast-2019-000350 (PMC7039611; doi:10.1136/bmjgast-2019-000350), 2020-02-17
Supplement: bmjgast-2019-000350supp001.pdf [file bmjgast-2019-000350supp001.pdf]

## Supplementary documents

### Supplemental Text 1. Systematic Review Protocol

#### Title: Risk factors of perioperative mortality from complicated peptic ulcer disease in Africa: a systematic review and meta-analysis

<sup>1</sup>Sarah Peiffer, MPH, <sup>1</sup>Matthew Pelton, B.S, <sup>1</sup>Laura Keeney, DO, MPH, <sup>1</sup>Eustina G. Kwon, MD, MPH, <sup>2</sup>Forster Amponsah-Manu, MD, FGCS, <sup>3</sup>Yubraj Acharya, PhD, Vernon M. Chinchilli, PhD<sup>5</sup>, <sup>1</sup>David I. Soybel, M.D., FACS, <sup>2\*</sup>John S. Oh, M.D., FACS, <sup>1,4,5\*</sup>Paddy Ssentongo, M.D., MPH

#### Background

Peptic ulcer disease (PUD) is a common affliction across the globe. According to the Global Burden of Disease estimates, PUD was responsible for over 300,000 deaths in 2013 globally.<sup>1</sup> Its sequelae are variable but can be deadly when PUD is complicated by bleeding, obstruction, or perforation.<sup>2</sup> Until recently, surgery was the dominant method of treatment. Currently, medical therapies provide effective treatment, thereby decreasing complications and the need for surgery.<sup>2,3</sup>

Overall, the success of medical therapy has led to a decreased incidence of complicated PUD. This evolution has occurred over the past century by three likely mechanisms: the improved socioeconomic conditions of patients, recognition and subsequent treatment of the pathogen *Helicobacter pylori* (*H. pylori*), and the advent of proton-pump inhibitors.<sup>2</sup> Additionally, diagnostic and therapeutic endoscopy has become a prominent component of PUD management. The benefits of these advances can be substantial, though they are not universally available.<sup>4</sup>

Despite these advances, the burden of this disease persists in low to middle-income countries (LMICs). Previous studies have found that countries with fewer resources exhibit higher rates of death from PUD.<sup>2</sup> In fact, PUD has been identified as the leading cause of death among emergent surgical conditions with a rate of 3.5 per 100,000 deaths, 85% of which occur in LMICs. No systematic review has investigated perioperative mortality rates following PUD surgery in all of Africa. Factors responsible for the variations in mortality rates have not been explored. To fill in the gap in knowledge, we aimed to systematically describe the literature on the profile of PUD requiring surgical intervention and the associated mortality in Africa and to explore sources of variations.

#### Objectives

The main objective of this review is to ascertain the perioperative mortality rates of complicated peptic ulcer disease in Africa. The specific aims of the systematic review are:

- (i) To provide an overview of perioperative mortality rates of complicated peptic ulcer disease across Africa;
- (ii) To identify and investigate the extent and sources of variations in perioperative mortality rates of complicated peptic ulcer disease across Africa and over time;
- (iii) To identify trends in indications for peptic ulcer disease surgery and operative techniques across Africa and over time.

#### Search Strategy

The search strategy will aim to identify all published studies conducted in Africa on perioperative mortality rates of complicated peptic ulcer disease.

##### *Inclusion criteria*

Studies will be included if they met the following inclusion criteria:

- Reported on the perioperative mortality rates among patients that underwent surgical treatment of complicated peptic ulcer disease in any African country;
- Conducted and published before February 8, 2019;
- Published in any language (no language restrictions will be imposed).

##### *Exclusion criteria*

Studies will be excluded if they were:

- Not conducted in humans;
- Regarding the epidemiology or nonoperative (medical or endoscopic) treatment of peptic ulcer disease;
- Case reports or sample size <5;
- Meeting abstracts, review papers, reports, and commentaries.

#### Database searches

The databases to be searched will include:

- EMBASE
- Medline
- Cochrane Library

Only these 3 databases will be searched as it is expected that saturation will be reached with the majority of studies appearing in all databases.

#### Search Terms

Keywords and Medical Subject Headings (MeSH) will be used to search the databases listed above. Broad search terms such as “peptic ulcer disease\*”, “gastric ulcer\*”, “duodenal ulcer\*”, AND “mortality”, AND “Africa” OR specific African country names will be used. A complete list of search terms will be developed and used across all four databases. Hand-searching of references from retrieved articles, meeting abstracts, review papers, reports, and commentaries will also be performed to identify any additional papers not captured by the electronic searches.

#### **Title and abstract screening**

The databases listed above will be searched and the citations retrieved will be downloaded into the Endnote software. Any duplicate articles identified by more than one data will be removed. The titles and abstracts will be screened by two reviewers independently and who will then compare results. Any study excluded from the review will be documented and the reason(s) for exclusion noted in a systematic way.

#### **Full-text screening and data extraction**

The full text of all the papers identified during the abstract screening step will be retrieved for full-text screening to confirm eligibility and, if eligible, to extract relevant data. For each eligible paper, data will be abstracted on the number of patients that underwent surgical treatment for peptic ulcer disease. Information on the following variables will be extracted: country of study, region of study, year of publication, study design, sample size, mean age, gender, history of PUD and duration of chronic symptoms, risk factors (Nonsteroidal Anti-Inflammatory Drugs (NSAIDs), smoking, alcohol, *H. pylori*), ASA status, presence of shock on admission, duration of acute symptoms, presence of free air on X-ray, ulcer location, type of PUD complication (bleeding, perforation, obstruction, or other), type of surgical procedure, and mortality rate. The full-text of any eligible studies identified through hand searches will also be reviewed using the methodology described above. The full-text review and data extraction will be done independently by three reviewers. Any discrepancies will be resolved by discussion among the reviewers and consensus will be reached by majority rule.

#### **Assessment of Methodological Quality of the Papers**

The quality of the papers included in the review will be assessed using the Oxford Center for Evidence-Based Medicine’s Levels of Evidence Guidelines (March 2009).

#### **Data Analysis**

The extracted data will be analyzed using the R Statistical Software. An initial descriptive analysis will be done to provide information about the study population, study design, the region of Africa (sub-Saharan vs. Northern), sub-region of Africa (western, eastern, central, southern and northern), and patient clinical characteristics. These results will be presented in both narrative and tabular form. The overall probability of perioperative mortality will be the primary outcome of interest in this review. This will be defined as the proportion of patients with complicated PUD that die preoperatively. The R package will be used to graphically display estimated pooled probabilities using random effect models. Between-study heterogeneity will be examined using the  $I^2$ -statistics and the P-value for heterogeneity (Cochrane’s Q statistic) test. Meta-regression analysis will be performed to identify independent sources of heterogeneity such as country/region, gender, age and year of publication. Ascertainment/ Publication bias will be assessed using funnel plots and the Egger’s test. To investigate the trend of mortality rate in Africa we will investigate mortality rates as a function of publication date (a proxy for secular trend).

| Section/topic                      | #  | Checklist item                                                                                                                                                                                                                                                                                              | Reported on page #              |
|------------------------------------|----|-------------------------------------------------------------------------------------------------------------------------------------------------------------------------------------------------------------------------------------------------------------------------------------------------------------|---------------------------------|
| <b>TITLE</b>                       |    |                                                                                                                                                                                                                                                                                                             |                                 |
| Title                              | 1  | Identify the report as a systematic review, meta-analysis, or both.                                                                                                                                                                                                                                         | 1                               |
| <b>ABSTRACT</b>                    |    |                                                                                                                                                                                                                                                                                                             |                                 |
| Structured summary                 | 2  | Provide a structured summary including, as applicable: background; objectives; data sources; study eligibility criteria, participants, and interventions; study appraisal and synthesis methods; results; limitations; conclusions and implications of key findings; systematic review registration number. | 2                               |
| <b>INTRODUCTION</b>                |    |                                                                                                                                                                                                                                                                                                             |                                 |
| Rationale                          | 3  | Describe the rationale for the review in the context of what is already known.                                                                                                                                                                                                                              | 5                               |
| Objectives                         | 4  | Provide an explicit statement of questions being addressed with reference to participants, interventions, comparisons, outcomes, and study design (PICOS).                                                                                                                                                  | 5                               |
| <b>METHODS</b>                     |    |                                                                                                                                                                                                                                                                                                             |                                 |
| Protocol and registration          | 5  | Indicate if a review protocol exists, if and where it can be accessed (e.g., Web address), and, if available, provide registration information including registration number.                                                                                                                               | 6                               |
| Eligibility criteria               | 6  | Specify study characteristics (e.g., PICOS, length of follow-up) and report characteristics (e.g., years considered, language, publication status) used as criteria for eligibility, giving rationale.                                                                                                      | 6                               |
| Information sources                | 7  | Describe all information sources (e.g., databases with dates of coverage, contact with study authors to identify additional studies) in the search and date last searched.                                                                                                                                  | Supplemental Table 2            |
| Search                             | 8  | Present full electronic search strategy for at least one database, including any limits used, such that it could be repeated.                                                                                                                                                                               | Supplemental Table 2            |
| Study selection                    | 9  | State the process for selecting studies (i.e., screening, eligibility, included in systematic review, and, if applicable, included in the meta-analysis).                                                                                                                                                   | 6                               |
| Data collection process            | 10 | Describe method of data extraction from reports (e.g., piloted forms, independently, in duplicate) and any processes for obtaining and confirming data from investigators.                                                                                                                                  | 7-8                             |
| Data items                         | 11 | List and define all variables for which data were sought (e.g., PICOS, funding sources) and any assumptions and simplifications made.                                                                                                                                                                       | 7-8                             |
| Risk of bias in individual studies | 12 | Describe methods used for assessing risk of bias of individual studies (including specification of whether this was done at the study or outcome level), and how this information is to be used in any data synthesis.                                                                                      | 8 and 10, Supplemental Figure 1 |
| Summary measures                   | 13 | State the principal summary measures (e.g., risk ratio, difference in means).                                                                                                                                                                                                                               | 7                               |
| Synthesis of results               | 14 | Describe the methods of handling data and combining results of studies, if done, including measures of consistency (e.g., $I^2$ ) for each meta-analysis.                                                                                                                                                   | 7                               |

Page 1 of 2

| Section/topic                 | #  | Checklist item                                                                                                                                                                                           | Reported on page #                |
|-------------------------------|----|----------------------------------------------------------------------------------------------------------------------------------------------------------------------------------------------------------|-----------------------------------|
| Risk of bias across studies   | 15 | Specify any assessment of risk of bias that may affect the cumulative evidence (e.g., publication bias, selective reporting within studies).                                                             | 7                                 |
| Additional analyses           | 16 | Describe methods of additional analyses (e.g., sensitivity or subgroup analyses, meta-regression), if done, indicating which were pre-specified.                                                         | 8 and 12 and Table 2 and Figure 8 |
| <b>RESULTS</b>                |    |                                                                                                                                                                                                          |                                   |
| Study selection               | 17 | Give numbers of studies screened, assessed for eligibility, and included in the review, with reasons for exclusions at each stage, ideally with a flow diagram.                                          | 8                                 |
| Study characteristics         | 18 | For each study, present characteristics for which data were extracted (e.g., study size, PICOS, follow-up period) and provide the citations.                                                             | S1Table                           |
| Risk of bias within studies   | 19 | Present data on risk of bias of each study and, if available, any outcome level assessment (see item 12).                                                                                                |                                   |
| Results of individual studies | 20 | For all outcomes considered (benefits or harms), present, for each study: (a) simple summary data for each intervention group (b) effect estimates and confidence intervals, ideally with a forest plot. | Figure 4                          |
| Synthesis of results          | 21 | Present results of each meta-analysis done, including confidence intervals and measures of consistency.                                                                                                  | 10                                |
| Risk of bias across studies   | 22 | Present results of any assessment of risk of bias across studies (see Item 15).                                                                                                                          | Supplemental Figure 1             |
| Additional analysis           | 23 | Give results of additional analyses, if done (e.g., sensitivity or subgroup analyses, meta-regression [see Item 16]).                                                                                    | 11                                |
| <b>DISCUSSION</b>             |    |                                                                                                                                                                                                          |                                   |
| Summary of evidence           | 24 | Summarize the main findings including the strength of evidence for each main outcome; consider their relevance to key groups (e.g., healthcare providers, users, and policy makers).                     | 11-14                             |
| Limitations                   | 25 | Discuss limitations at study and outcome level (e.g., risk of bias), and at review-level (e.g., incomplete retrieval of identified research, reporting bias).                                            | 15-16                             |
| Conclusions                   | 26 | Provide a general interpretation of the results in the context of other evidence, and implications for future research.                                                                                  | 11-14                             |
| <b>FUNDING</b>                |    |                                                                                                                                                                                                          |                                   |
| Funding                       | 27 | Describe sources of funding for the systematic review and other support (e.g., supply of data); role of funders for the systematic review.                                                               | 8                                 |

From: Moher D, Liberati A, Tetzlaff J, Altman DG, The PRISMA Group (2009). Preferred Reporting Items for Systematic Reviews and Meta-Analyses: The PRISMA Statement. PLoS Med 6(7): e1000097. doi:10.1371/journal.pmed1000097

For more information, visit: [www.prisma-statement.org](http://www.prisma-statement.org).

Page 2 of 2

### Supplemental Table 1: 2009 PRISMA Checklist

| Database                | Search Terms                                                                                                                                                                                                                                                                                                                                                                                                                                                                                                                                                                                                                                                                                                                                                                                                                                                                                                                                                                                                                                                                                                                                                                                                                               |
|-------------------------|--------------------------------------------------------------------------------------------------------------------------------------------------------------------------------------------------------------------------------------------------------------------------------------------------------------------------------------------------------------------------------------------------------------------------------------------------------------------------------------------------------------------------------------------------------------------------------------------------------------------------------------------------------------------------------------------------------------------------------------------------------------------------------------------------------------------------------------------------------------------------------------------------------------------------------------------------------------------------------------------------------------------------------------------------------------------------------------------------------------------------------------------------------------------------------------------------------------------------------------------|
| <b>Medline</b>          | <ol style="list-style-type: none"> <li>1. (Mortality OR mortality [Subheading]) OR Hospital Mortality OR Death OR Surgical Procedures, Operative OR surgery [Subheading]) OR Perioperative Period OR Postoperative Period)</li> <li>2. (Stomach Ulcer OR Peptic Ulcer OR Peptic Ulcer Perforation OR Peptic Ulcer Hemorrhage OR Duodenal Ulcer )</li> <li>3. (Africa OR Africa South of the Sahara OR Angola OR Benin OR Botswana OR Burkina Faso OR Burundi OR Cameroun OR Cameroon OR Cape Verde OR Chad OR Central African Republic of Comoros OR Congo OR Cote d'Ivoire OR Democratic Republic of the Congo OR Equatorial Guinea OR Eritrea OR Ethiopia OR Gabon OR Gambia OR Ghana OR Guinea OR Guinea Bissau OR Kenya OR Lesotho OR Liberia OR Madagascar OR Malawi OR Mali OR Mozambique OR Namibia OR Niger OR Nigeria OR Rwanda OR Sao Tome OR Senegal OR Seychelles OR Sierra Leone OR Somalia OR South Africa OR Swaziland OR Togo OR Uganda OR Tanzania OR Zambia OR Zimbabwe OR Africa, Northern, OR Algeria OR Egypt OR Libya OR Morocco OR Tunisia OR western Sahara OR South Africa OR Africa, Western OR Africa, Southern OR Africa, Northern OR Africa, Eastern OR Africa, Central)</li> <li>4. 1 AND 2 AND 3</li> </ol> |
| <b>EMBASE</b>           | <ol style="list-style-type: none"> <li>1. (Mortality OR mortality [Subheading]) OR Hospital Mortality OR Surgical Procedures, Operative OR surgery [Subheading]) OR Perioperative Period OR Postoperative Period)</li> <li>2. (Stomach Ulcer OR Peptic Ulcer OR Peptic Ulcer Perforation OR Peptic Ulcer Hemorrhage OR Duodenal Ulcer )</li> <li>3. (Africa OR Africa South of the Sahara OR Angola OR Benin OR Botswana OR Burkina Faso OR Burundi OR Cameroun OR Cameroon OR Cape Verde OR Chad OR Central African Republic of Comoros OR Congo OR Cote d'Ivoire OR Democratic Republic of the Congo OR Equatorial Guinea OR Eritrea OR Ethiopia OR Gabon OR Gambia OR Ghana OR Guinea OR Guinea Bissau OR Kenya OR Lesotho OR Liberia OR Madagascar OR Malawi OR Mali OR Mozambique OR Namibia OR Niger OR Nigeria OR Rwanda OR Sao Tome OR Senegal OR Seychelles OR Sierra Leone OR Somalia OR South Africa OR Swaziland OR Togo OR Uganda OR Tanzania OR Zambia OR Zimbabwe OR Africa, Northern, OR Algeria OR Egypt OR Libya OR Morocco OR Tunisia OR western Sahara OR South Africa OR Africa, Western OR Africa, Southern OR Africa, Northern OR Africa, Eastern OR Africa, Central)</li> <li>4. 1 AND 2 AND 3</li> </ol>          |
| <b>Cochrane Library</b> | <ol style="list-style-type: none"> <li>1. (Mortality OR mortality [Subheading]) OR Hospital Mortality OR Surgical Procedures, Operative OR surgery [Subheading]) OR Perioperative Period OR Postoperative Period)</li> <li>2. (Stomach Ulcer OR Peptic Ulcer OR Peptic Ulcer Perforation OR Peptic Ulcer Hemorrhage OR Duodenal Ulcer )</li> <li>3. (Africa OR Africa South of the Sahara OR Angola OR Benin OR Botswana OR Burkina Faso OR Burundi OR Cameroun OR Cameroon OR Cape Verde OR Chad OR Central African Republic of Comoros OR Congo OR Cote d'Ivoire OR Democratic Republic of the Congo OR Equatorial Guinea OR Eritrea OR Ethiopia OR Gabon OR Gambia OR Ghana OR Guinea OR Guinea Bissau OR Kenya OR Lesotho OR Liberia OR Madagascar OR Malawi OR Mali OR Mozambique OR Namibia OR Niger OR Nigeria OR Rwanda OR Sao Tome OR Senegal OR Seychelles OR Sierra Leone OR Somalia OR South Africa OR Swaziland OR Togo OR Uganda OR Tanzania OR Zambia OR Zimbabwe OR Africa, Northern, OR Algeria OR Egypt OR Libya OR Morocco OR Tunisia OR western Sahara OR South Africa OR Africa, Western OR Africa, Southern OR Africa, Northern OR Africa, Eastern OR Africa, Central)</li> <li>4. 1 AND 2 AND 3</li> </ol>          |

Supplemental Table 2: Literature search strategy

| Decade    | Surgeries by Indication |          |             |                           |                      | Total Surgeries | Percent Complicated |
|-----------|-------------------------|----------|-------------|---------------------------|----------------------|-----------------|---------------------|
|           | Perforation             | Bleeding | Obstruction | Complicated Total (P+B+O) | Other /Uncomplicated |                 |                     |
| 2010-2019 | 1122                    | 62       | 341         | 1525                      | 0                    | 1525            | 100.00%             |
| 2000-2010 | 1286                    | 31       | 335         | 1652                      | 32                   | 1684            | 98.11%              |
| 1990-2000 | 304                     | 95       | 392         | 791                       | 386                  | 1177            | 67.18%              |
| 1980-1990 | 882                     | 442      | 678         | 2002                      | 983                  | 2985            | 67.08%              |
| 1970-1980 | 225                     | 96       | 199         | 520                       | 631                  | 1151            | 45.19%              |
| 1955-1970 | 296                     | 149      | 249         | 694                       | 818                  | 1512            | 45.90%              |

**Supplemental Table 3: Temporal distribution of indication for complicated PUD. Recent surgeries were predominantly for perforations.**

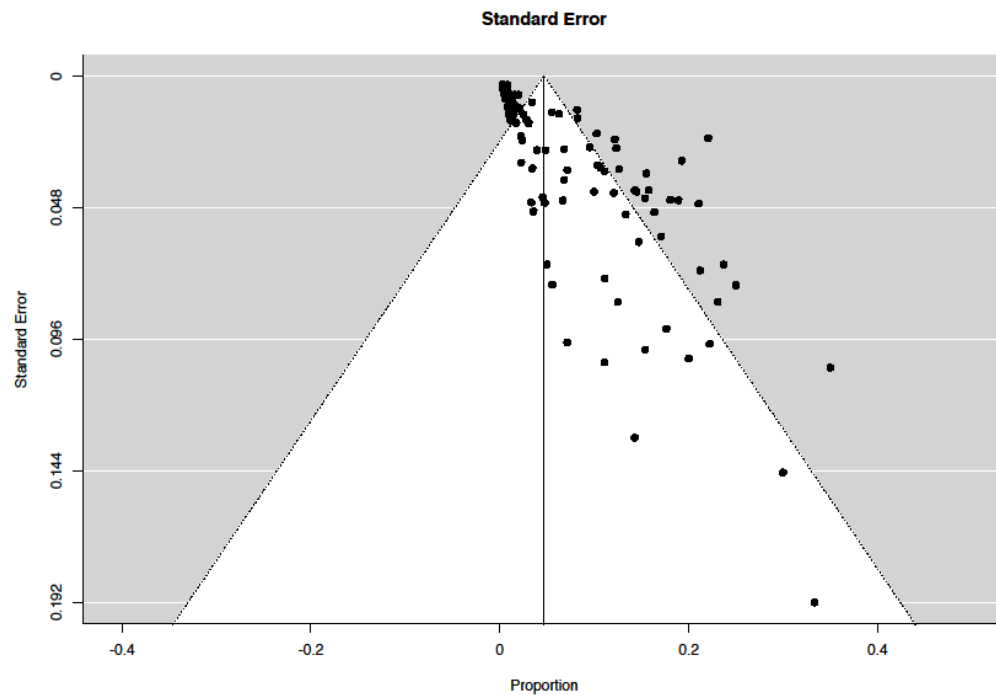

**Supplemental Figure 1: Funnel plot to assess publication bias. Note the asymmetry of the plot indicating the presence of publication bias. Egger's test was significant ( $p < 0.0001$ ).**

Summary Table

| Author (Year)       | Region  | Country      | Type of Study | Level of Evidence | Sample Size | Mean Age | Male (%) | Mortality, n (%) | Indication      |              |                 |                      | Procedure          |                         |                        |              |                   |
|---------------------|---------|--------------|---------------|-------------------|-------------|----------|----------|------------------|-----------------|--------------|-----------------|----------------------|--------------------|-------------------------|------------------------|--------------|-------------------|
|                     |         |              |               |                   |             |          |          |                  | Perforation (%) | Bleeding (%) | Obstruction (%) | Other Indication (%) | Primary Repair (%) | Vagotomy & Drainage (%) | Resection & Repair (%) | Drainage (%) | Other/Unknown (%) |
| Reihmer (1955)      | Central | Cameroon     | Re, Co        | 2b                | 319         | 41       | 66       | 5 (1.6)          | -               | -            | -               | 100                  | -                  | -                       | 3                      | 97           | -                 |
| Parodi (1961)       | Central | Cameroon     | Re, Co        | 2b                | 57          | 32       | 91       | 1 (1.7)          | 30              | 14           | 28              | 28                   | -                  | -                       | 100                    | -            | -                 |
| Yates (1964)        | Central | Congo        | Re,Co         | 2b                | 29          |          |          | 1 (3.4)          | -               | -            | -               | 100                  | -                  | 17                      | 17                     | 66           | -                 |
| Snyder (1963)       | East    | Burundi      | Re,Co         | 2b                | 30          | 20-40    | 93       | 2 (6.7)          | 20              | -            | 77              | 3                    | 13                 | -                       | 3                      | 84           | -                 |
| Hamber (1971)       | East    | Burundi      | Re,Co         | 2b                | 404         |          | 75       | 8 (2.0)          | 2               | -            | 15              | 83                   | 2                  | 82                      | 3                      | 13           | -                 |
| Hamber (1972)       | East    | Burundi      | Re,Co         | 2b                | 17          |          | 100      | 3 (17.6)         | 12              | 30           | -               | 58                   | 6                  | 59                      | 29                     | -            | 6                 |
| Hamber (1973)       | East    | Burundi      | Re,Co         | 2b                | 62          | 51       | 70       | 3 (4.8)          | -               | 8            | 11              | 81                   | -                  | 47                      | 35                     | 18           | -                 |
| Makuria (1985)      | East    | Ethiopia     | Re,Co         | 2b                | 725         | 35       | 81       | 6 (0.8)          | 2               | 4            | 58              | 36                   | -                  | 89                      | 10                     | 1            | -                 |
| Ali (1991)          | East    | Ethiopia     | Re,Co         | 2b                | 230         | 37       | 83       | 2 (0.9)          | 3               | 25           | 70              | 3                    | 2                  | 84                      | 5                      | 2            | 7                 |
| Ersumo (2004)       | East    | Ethiopia     | Re,Co         | 2b                | 351         | 37       | 85       | 12 (3.4)         | 21              | 4            | 68              | 7                    | 20                 | 78                      | 1                      | 1            | -                 |
| Ersumo (2005)       | East    | Ethiopia     | Re,Co         | 2b                | 74          | 33       | 88       | 14 (18.9)        | 100             | -            | -               | -                    | 96                 | 3                       | -                      | -            | 1                 |
| Asefa (2012)        | East    | Ethiopia     | Re,Co         | 2b                | 76          | 32       | 87       | 12 (15.8)        | 100             | -            | -               | -                    | 96                 | 4                       | -                      | -            | -                 |
| Bekele (2017)       | East    | Ethiopia     | Re,Co         | 2b                | 87          | 33       | 86       | 9 (1.0)          | 100             | -            | -               | -                    | 100                | -                       | -                      | -            | -                 |
| Khan (1958)         | East    | Kenya        | Re,Co         | 2b                | 9           | 31       | 71       | 1 (11.1)         | 78              | -            | -               | 22                   | -                  | -                       | -                      | 100          | -                 |
| Miller (1966)       | East    | Kenya        | Re,Co         | 2b                | 98          | 38       | 80       | 3 (3.1)          | 31              | 18           | 51              | -                    | -                  | 60                      | -                      | 17           | 22                |
| Jani (1987)         | East    | Kenya        | Re,Co         | 2b                | 65          | 35       |          | 10 (15.4)        | 100             | -            | -               | -                    | 94                 | -                       | -                      | -            | 6                 |
| Kakanda (1991)      | East    | Kenya        | Re,Co         | 2b                | 157         | 38       | 73       | 2 (1.3)          | 5               | 5            | 36              | 54                   | 4                  | 84                      | 8                      | 4            | -                 |
| Kuremu (2002)       | East    | Kenya        | Re,Co         | 2b                | 53          | 47       | 63       | 0 (0)            | 57              | 4            | 34              | 6                    | 47                 | 49                      | 4                      | -            | -                 |
| Khan (1958)         | East    | Rwanda       | Re,Co         | 2b                | 130         |          |          | 2 (1.7)          | 8               | -            | -               | 92                   | -                  | -                       | 92                     | -            | 8                 |
| Stone (1981)        | East    | Tanzania     | Re,Co         | 2b                | 42          | 40       | 64       | 0 (0)            | 7               | 2            | -               | 90                   | 7                  | 88                      | 2                      | -            | 3                 |
| Chalya (2011)       | East    | Tanzania     | R/P,Co        | 2b                | 84          | 32       | 57       | 9 (10.7)         | 100             | -            | -               | -                    | 83                 | 1                       | 1                      | -            | 14                |
| Hancock (1971)      | East    | Uganda       | Re,Co         | 2b                | 8           |          | 75       | 0 (0)            | 25              | -            | 13              | 62                   | 12                 | 50                      | -                      | 38           | -                 |
| Nzarubara (2005)    | East    | Uganda       | Re,Co         | 2b                | 7           | 37       | 71       | 1 (14.3)         | 100             | -            | -               | -                    | 71                 | 14                      | 15                     | -            | -                 |
| Gillot (1960)       | North   | Algeria      | Re,Co         | 2b                | 9           | 14       | 56       | 0 (0)            | 33              | -            | 67              | -                    | 33                 | 11                      | 33                     | 23           | -                 |
| Leutenegger (1967)  | North   | Algeria      | Re,Co         | 2b                | 26          | 46       | 100      | 6 (23.1)         | -               | 100          | -               | -                    | -                  | -                       | -                      | -            | 100               |
| El-Wakil (1964)     | North   | Egypt        | Re,Co         | 2b                | 85          | 9        | 96       | 1 (1.2)          | 100             | -            | -               | -                    | 89                 | -                       | 11                     | -            | -                 |
| Anwar (1996)        | North   | Egypt        | Re,Co         | 2b                | 32          | 43       | 78       | 8 (25.0)         | 16              | 9            | 47              | 28                   | 16                 | 78                      | 6                      | -            | -                 |
| Kafih (2000)        | North   | Morocco      | Re,Co         | 2b                | 44          | 36       | 95       | 0 (0)            | 100             | -            | -               | -                    | 2                  | 68                      | -                      | -            | 30                |
| Elnagib (2008)      | North   | Sudan        | Pr,Co         | 2b                | 58          |          | 90       | 7 (12.1)         | 100             | -            | -               | -                    | 95                 | -                       | -                      | -            | 5                 |
| Kehila (1988)       | North   | Tunisia      | Re,Co         | 2b                | 62          |          |          | 0 (0)            | 8               | 16           | 11              | 65                   | -                  | 5                       | 85                     | -            | 10                |
| Sakhri (2000)       | North   | Tunisia      | Re,Co         | 2b                | 107         | 35       | 96       | 3 (2.7)          | 100             | -            | -               | -                    | 2                  | 97                      | 1                      | -            | -                 |
| Abid (2009)         | North   | Tunisia      | Re,Co         | 2b                | 84          | 28       | 96       | 0 (0)            | 100             | -            | -               | -                    | 100                | -                       | -                      | -            | -                 |
| Ben Chaabane (2010) | North   | Tunisia      | Re,Co         | 2b                | 44          | 54       | 63       | 3 (6.8)          | -               | 100          | -               | -                    | 70                 | -                       | 30                     | -            | -                 |
| Ayadi (2014)        | North   | Tunisia      | Re,Co         | 2b                | 138         | 48       | 85       | 0 (0)            | -               | -            | 100             | -                    | -                  | 84                      | -                      | 1            | 15                |
| Abid (2014)         | North   | Tunisia      | Re,Co         | 2b                | 290         | 34       | 97       | 2 (0.6)          | 100             | -            | -               | -                    | 100                | -                       | -                      | -            | -                 |
| Hamzaoui (2015)     | North   | Tunisia      | Re,Co         | 2b                | 13          | 52       | 92       | 0 (0)            | -               | -            | 100             | -                    | -                  | 100                     | -                      | -            | -                 |
| Gouta (2018)        | North   | Tunisia      | Re,Co         | 2b                | 81          | 45       | 86       | 9 (11.1)         | 100             | -            | -               | -                    | 100                | -                       | -                      | -            | -                 |
| Kark (1961)         | South   | South Africa | Re,Co         | 2b                | 291         | 35       | 89       | 16 (5.5)         | 18              | 17           | -               | 65                   | 45                 | -                       | 55                     | -            | -                 |
| Du Plessis (1965)   | South   | South Africa | Re,Co         | 2b                | 126         |          | 57       | 12 (9.5)         | 29              | 18           | 17              | 36                   | 27                 | 45                      | 28                     | -            | -                 |



|                          |       |              |        |    |     |     |     |           |     |     |     |     |     |     |     |    |     |
|--------------------------|-------|--------------|--------|----|-----|-----|-----|-----------|-----|-----|-----|-----|-----|-----|-----|----|-----|
| Bremner (1972)           | South | South Africa | Re,Co  | 2b | 51  | 36  | 93  | 2 (3.9)   | 47  | 9   | 22  | 22  | -   | 63  | 4   | -  | 33  |
| Cooke (1977)             | South | South Africa | Re,Co  | 2b | 71  | 33  | 93  | 1 (1.4)   | 100 | -   | -   | -   | 75  | 25  | -   | -  | -   |
| Brozin (1977)            | South | South Africa | Re,Co  | 2b | 14  | 31  | 94  | 0 (0)     | 100 | -   | -   | -   | 100 | -   | -   | -  | -   |
| Bank (1980)              | South | South Africa | Re,Co  | 2b | 311 |     |     | 1 (0.3)   | -   | -   | -   | 100 | -   | 39  | -   | -  | 61  |
| Schein (1986)            | South | South Africa | Re,Co  | 2b | 95  | 55  | 66  | 12 (12.6) | 100 | -   | -   | -   | 66  | 8   | 24  | -  | 1   |
| Schein (1986)            | South | South Africa | Re,Co  | 2b | 33  | 59  | 44  | 21.9      | 100 | -   | -   | -   | 33  | -   | 61  | -  | 6   |
| Decker (1987)            | South | South Africa | Re,Co  | 2b | 38  | >50 | 67  | 9 (23.7)  | -   | 100 | -   | -   | -   | 42  | 13  | -  | 45  |
| Schein (1989)            | South | South Africa | Re,Co  | 2b | 489 | 54  | 60  | 40 (8.2)  | 33  | 31  | 7   | 29  | 21  | 3   | 36  | 16 | 24  |
| Schein (1989)            | South | South Africa | Pr,Co  | 2b | 154 | 60  | 65  | 19 (12.3) | -   | 100 | -   | -   | 5   | 26  | 67  | -  | 3   |
| Schein (1990)            | South | South Africa | R/P,Co | 2b | 197 | 52  | 59  | 24 (12.2) | 100 | -   | -   | -   | 49  | 14  | 19  | -  | 18  |
| Schein (1991)            | South | South Africa | Pr,Co  | 2b | 72  |     |     | 13 (18.1) | 67  | 33  | -   | -   | -   | -   | -   | -  | 100 |
| Levin (2012)             | South | South Africa | Re,Co  | 2b | 18  | 57  | 60  | 4 (22.0)  | -   | 100 | -   | -   | -   | -   | -   | -  | 100 |
| Makhadi (2017)           | South | South Africa | Re,Co  | 2b | 132 |     |     | 1 (0.8)   | 100 | -   | -   | -   | 100 | -   | -   | -  | -   |
| Doctor (1970)            | South | Zambia       | Pr,Co  | 2b | 80  | 34  | 94  | 1 (1.3)   | 28  | 15  | -   | 58  | 26  | 26  | 3   | -  | 45  |
| Kiire (1987)             | South | Zimbabwe     | Pr,Co  | 2b | 13  | 39  | 76  | 2 (15.4)  | 8   | 92  | -   | -   | -   | 62  | 38  | -  | -   |
| Tournier-Lasserve (1961) | West  | Benin        | Re,Co  | 2b | 121 | 39  | 92  | 3 (2.5)   | 15  | 19  | 64  | 2   | -   | -   | 100 | -  | -   |
| Robert (1964)            | West  | Benin        | Re,Co  | 2b | 115 | 35  | 83  | 2 (1.7)   | 13  | 1   | 23  | 62  | 9   | 60  | 30  | -  | 1   |
| Nuhu (2008)              | West  | Gambia       | Re,Co  | 2b | 41  | 45  | 83  | 7 (17.1)  | 100 | -   | -   | -   | 71  | -   | 7   | 2  | 20  |
| Nyame (1973)             | West  | Ghana        | Re,Co  | 2b | 10  | 38  | 90  | 3 (30)    | 25  | 75  | -   | -   | 20  | 60  | -   | 20 | -   |
| Ohene-Yeboah (2006)      | West  | Ghana        | Pr,Co  | 2b | 331 | 52  | 71  | 73 (22.1) | 100 | -   | -   | -   | 94  | -   | -   | -  | 6   |
| Dakubo (2009)            | West  | Ghana        | R/P,Co | 2b | 316 | 41  | 82  | 26 (8.2)  | 100 | -   | -   | -   | 95  | 3   | 2   | -  | -   |
| Yangni-Angate (1980)     | West  | Ivory Coast  | Re,Co  | 2b | 69  | 34  | 99  | 10 (12.5) | 100 | -   | -   | -   | 83  | 10  | 1   | 6  | -   |
| Gona (2016)              | West  | Ivory Coast  | Re,Co  | 2b | 161 | 34  | 91  | 31 (19.3) | 100 | -   | -   | -   | 99  | -   | 1   | -  | -   |
| Moses (2014)             | West  | Liberia      | Pr,Co  | 2b | 20  | 33  | 85  | 7 (35.0)  | 100 | -   | -   | -   | 100 | -   | -   | -  | -   |
| Davey (1964)             | West  | Nigeria      | Re,Co  | 2b | 6   | 40  |     | 0 (0)     | -   | -   | -   | 100 | -   | 50  | 50  | -  | -   |
| Solanke (1970)           | West  | Nigeria      | Pr,Co  | 2b | 144 |     | 72  | 3 (2.1)   | -   | 7   | 30  | 63  | -   | 98  | -   | -  | 2   |
| Solanke (1971)           | West  | Nigeria      | Pr,Co  | 2b | 48  | 39  | 63  | 0 (0)     | 0   | 0   | 40  | 60  | -   | 100 | -   | -  | -   |
| Kolawole (1974)          | West  | Nigeria      | Pr,Co  | 2b | 51  | 32  | 84  | 0 (0)     | 2   | 4   | 24  | 71  | -   | 100 | -   | -  | -   |
| Mabogunje (1979)         | West  | Nigeria      | Re,Co  | 2b | 34  |     | 77  | 5 (14.7)  | 35  | 27  | 32  | 6   | 26  | 50  | 18  | 6  | -   |
| Ajao (1979)              | West  | Nigeria      | Re,Co  | 2b | 16  | 39  | 88  | 2 (12.5)  | 100 | -   | -   | -   | 100 | -   | -   | -  | -   |
| Adekunle (1983)          | West  | Nigeria      | Pr,Co  | 2b | 200 | 36  | 75  | 2 (1.0)   | -   | 16  | 52  | 32  | -   | 99  | 1   | -  | -   |
| Mabogunje (1985)         | West  | Nigeria      | Re,Co  | 2b | 302 | 37  | 77  | 19 (6.3)  | 25  | 16  | 35  | 24  | 16  | 77  | 2   | 5  | -   |
| Mabogunje (1985)         | West  | Nigeria      | Re,Co  | 2b | 103 | 35  | 89  | 16 (15.5) | 100 | -   | -   | -   | 68  | 11  | 6   | 5  | 11  |
| Arigbabu (1986)          | West  | Nigeria      | Re,Co  | 2b | 102 |     |     | 0 (0)     | -   | -   | -   | 100 | -   | 100 | -   | -  | -   |
| Iwatt (1988)             | West  | Nigeria      | Pr,Co  | 2b | 6   | 24  | 100 | 2 (33.3)  | 100 | -   | -   | -   | 100 | -   | -   | -  | -   |
| Otu (1990)               | West  | Nigeria      | Pr,Co  | 2b | 205 | 35  | 75  | 21 (10.2) | 100 | -   | -   | -   | 100 | -   | -   | -  | -   |
| Ofili (1991)             | West  | Nigeria      | Pr,Co  | 2b | 21  | 39  | 71  | 0 (0)     | -   | -   | 100 | -   | -   | 100 | -   | -  | -   |
| Lawal (1998)             | West  | Nigeria      | Re,Co  | 2b | 15  | 41  | 93  | 3 (20.0)  | 100 | -   | -   | -   | 53  | 40  | -   | 7  | -   |
| Ameh (1998)              | West  | Nigeria      | Re,Co  | 2b | 88  | 37  | 78  | 6 (6.8)   | 17  | 1   | 41  | 41  | 13  | 86  | 1   | -  | -   |
| Sabo (1999)              | West  | Nigeria      | Re,Co  | 2b | 58  | 37  | 78  | 1 (1.7)   | -   | -   | 100 | -   | -   | 98  | 2   | -  | -   |
| Ameh (1999)              | West  | Nigeria      | Re,Co  | 2b | 6   | 12  | 83  | 0 (0)     | 16  | 16  | 33  | 35  | 17  | 83  | -   | -  | -   |
| Dogo (1999)              | West  | Nigeria      | Re,Co  | 2b | 42  | 35  | 87  | 1 (2.4)   | -   | -   | 100 | -   | -   | 100 | -   | -  | -   |
| Adesunkanmi (2003)       | West  | Nigeria      | Pr,Co  | 2b | 18  | 42  | 75  | 2 (11.1)  | 100 | -   | -   | -   | -   | -   | -   | -  | 100 |
| Irabor (2005)            | West  | Nigeria      | Re,Co  | 2b | 122 | 45  | 74  | 0 (0)     | 30  | 10  | 57  | 3   | 32  | 64  | 4   | -  | -   |
| Mbah (2008)              | West  | Nigeria      | Re,Co  | 2b | 21  | 41  | 86  | 1 (4.8)   | 43  | 19  | 33  | 5   | 48  | 48  | 4   | -  | -   |

|                  |      |         |       |    |     |          |     |           |     |   |     |     |     |    |     |   |     |
|------------------|------|---------|-------|----|-----|----------|-----|-----------|-----|---|-----|-----|-----|----|-----|---|-----|
| Nuhu (2009)      | West | Nigeria | Re,Co | 2b | 55  | 40       | 80  | 9 (16.4)  | 100 | - | -   | -   | 87  | 2  | -   | - | 11  |
| Etonyeaku (2013) | West | Nigeria | Re,Co | 2b | 45  | 40       | 82  | 6 (13.3)  | 100 | - | -   | -   | 98  | -  | -   | 2 | -   |
| Ugochukwu (2013) | West | Nigeria | Re,Co | 2b | 76  | 40       | 76  | 16 (21.1) | 100 | - | -   | -   | 100 | -  | -   | - | -   |
| Nwashilli (2015) | West | Nigeria | Re,Co | 2b | 70  | 45       | 84  | 10 (14.3) | 100 | - | -   | -   | 97  | -  | -   | - | 3   |
| Bezes (1958)     | West | Senegal | Re,Co | 2b | 44  | 30 to 40 |     | 0 (0)     | 35  | - | 65  | -   | -   | -  | 100 | - | -   |
| Vovor (1972)     | West | Senegal | Re,Co | 2b | 50  | 32       | 100 | 5 (8.6)   | 100 | - | -   | -   | 84  | 14 | 2   | - | -   |
| Sow (1981)       | West | Senegal | Re,Co | 2b | 56  | 31       | 94  | 4 (7.5)   | 100 | - | -   | -   | 64  | 32 | 4   | - | -   |
| Andreu (1999)    | West | Senegal | Pr,Co | 2b | 250 | 28       | 70  | 2 (0.8)   | -   | - | -   | 100 | -   | -  | -   | - | 100 |
| Konate (2010)    | West | Senegal | Re,Co | 2b | 160 | 43       | 79  | 0 (0)     | -   | - | 100 | -   | -   | 99 | 1   | - | -   |
| Gogler (1974)    | West | Togo    | Re,Co | 2b | 45  | 36       | 100 | 1 (2.2)   | -   | 4 | 76  | 20  | -   | 96 | 4   | - | -   |
| Kassegne (2016)  | West | Togo    | Re,Co | 2b | 22  | 38       | 83  | 1 (4.5)   | -   | - | 100 | -   | -   | 77 | 23  | - | -   |

Re,Co: Retrospective cohort study; Pr,Co: Prospective cohort study; R/P,Co: Retrospective/Prospective cohort study.



## References

1. El-Wakil, I. (1964). PERFORATED PEPTIC ULCER. REVIEW OF 85 CASES. *J Egypt Med Assoc*, 47, 65-72.
2. Abid, M., Ben Amar, M., Guirat Moheddine, A., Cheikhrouhou, H., Amouri, A., Khlif, M., . . . Beyrouti, M. I. (2009). [Laparoscopic treatment of perforated duodenal ulcer: 84 cases in Tunisia]. *Med Trop (Mars)*, 69(6), 569-572.
3. Kassegne, I., Sewa, E. V., Kanassoua, K. K., Alassani, F., Adabra, K., Amavi, K., . . . Attipou, K. (2016). Management of peptic pyloroduodenal stenosis in Sylvanus Olympio teaching hospital in Lome (Togo). *Med Sante Trop*, 26(2), 189-191. doi:10.1684/mst.2016.0549
4. Etonyeaku, A. C., Agbakwuru, E. A., Akinkuolie, A. A., Omotola, C. A., Talabi, A. O., Onyia, C. U., . . . Aladesuru, O. A. (2013). A review of the management of perforated duodenal ulcers at a tertiary hospital in south western Nigeria. *Afr Health Sci*, 13(4), 907-913. doi:10.4314/ahs.v13i4.7
5. Ugochukwu, A. I., Amu, O. C., Nzegwu, M. A., & Dilibe, U. C. (2013). Acute perforated peptic ulcer: on clinical experience in an urban tertiary hospital in south east Nigeria. *Int J Surg*, 11(3), 223-227. doi:10.1016/j.ijsu.2013.01.015
6. Asefa, Z., & A. G. e. (2012). Perforated peptic ulcer disease in Zewditu Hospital. *Ethiop Med J*, 50(2), 145-151.
7. Nuhu, A., Madziga, A. G., & Gali, B. M. (2009). Acute perforated duodenal ulcer in Maiduguri: experience with simple closure and Helicobacter pylori eradication. *West Afr J Med*, 28(6), 384-387.
8. Dakubo, J. C., Naaeder, S. B., & Clegg-Lampsey, J. N. (2009). Gastro-duodenal peptic ulcer perforation. *East Afr Med J*, 86(3), 100-109.
9. Mbah, N., Opara, W. E., & Adesanya, O. A. (2008). Decreasing need for elective peptic ulcer disease surgery. *West Afr J Med*, 27(4), 255-258.
10. Nuhu, A., & Kassama, Y. (2008). Experience with acute perforated duodenal ulcer in a West African population. *Niger J Med*, 17(4), 403-406.
11. Ohene-Yeboah, M., & Togbe, B. (2006). Perforated gastric and duodenal ulcers in an urban African population. *West Afr J Med*, 25(3), 205-211.
12. Ersumo, T., Ali, A., & Kotiso, B. (2004). Complicated peptic ulcer disease in Tikur Anbessa Hospital, Addis Ababa. *Ethiop Med J*, 42(2), 87-95.
13. Ersumo, T., Y. W. M., & Kotisso, B. (2005). Perforated peptic ulcer in Tikur Anbessa Hospital: a review of 74 cases. *Ethiop Med J*, 43(1), 9-13.
14. Irabor, D. O. (2005). An audit of peptic ulcer surgery in Ibadan, Nigeria. *West Afr J Med*, 24(3), 242-245.
15. Nzarubara, G. R. (2005). Cost effective management of duodenal ulcers in Uganda: interventions based on a series of seven cases. *Afr Health Sci*, 5(1), 73-78.
16. Kuremu, R. T. (2002). Surgical management of peptic ulcer disease. *East Afr Med J*, 79(9), 454-456.
17. Sabo, S. Y., & Ameh, E. A. (1999). Obstructing duodenal ulcers in a tropical population. *East Afr Med J*, 76(12), 690-692.
18. Ameh, E. A. (1999). Peptic ulcer disease in childhood in Zaria, Nigeria. *Ann Trop Paediatr*, 19(1), 65-68.
19. Andreu, J. M., Tardat, E., Balandraud, P., & Cador, L. (1999). [Truncal vagotomy using videothoracoscopy without gastric drainage. A prospective study of 250 cases surgically treated in Senegal]. *Chirurgie*, 124(4), 406-411.
20. Lawal, O. O., Fadiran, O. A., Oluwole, S. F., & Campbell, B. (1998). Clinical pattern of perforated prepyloric and duodenal ulcer at Ile-Ife, Nigeria. *Trop Doct*, 28(3), 152-155. doi:10.1177/004947559802800309
21. Ameh, E. A., & Nmadi, P. T. (1998). Pattern of peptic ulcer disease in Zaria, Nigeria. *East Afr Med J*, 75(2), 90-92.
22. Ali, A. (1991). Review of the management of duodenal ulcer in Tikur Anbessa Hospital Department of Surgery, 1973-1980. *East Afr Med J*, 68(8), 649-655.
23. Kakande, I. (1991). Peptic ulcer surgery at a rural hospital in Kenya. *East Afr Med J*, 68(1), 15-20.
24. Otu, A. A. (1990). Prospective evaluation of simple suture in the surgical treatment of perforated peptic ulcer. *West Afr J Med*, 9(4), 295-298.
25. Schein, M., & Decker, G. A. (1989). Five hundred operations for peptic ulcer disease at J.G. Strijdom Hospital, 1980-1987. *S Afr J Surg*, 27(5), 161-167.
26. Jani, P. G., & Ojara, E. A. (1987). Perforated peptic ulcers as seen at Kenyatta National Hospital. *East Afr Med J*, 64(5), 317-321.
27. Arigbabu, A. O., Omole, C. O., & Akinola, D. O. (1986). Duodenal ulcer treated by highly selective vagotomy. Evaluation of experience in Nigeria. *Trop Doct*, 16(4), 160-163. doi:10.1177/004947558601600408
28. Schein, M., Saadia, R., & Decker, G. A. (1986). Perforated peptic ulcer at the J.G. Strijdom Hospital. A retrospective study of 99 patients. *S Afr Med J*, 70(1), 21-23.
29. Mabogunje, O. A., & Lawrie, J. H. (1985). Surgical management of duodenal ulcer in Zaria, Nigeria. *J R Coll Surg Edinb*, 30(5), 283-287.
30. Mabogunje, C. A. (1985). Perforated duodenal and gastric ulcers in the Nigerian Savannah. *Int Surg*, 70(4), 327-330.
31. Makuria, T. (1985). Ulcer surgery in 725 patients in Ethiopia. *Ethiop Med J*, 23(2), 75-79.
32. Sow, M. L., Cherbonnel, G., Toure, C. T., & Diop, A. (1981). [Gastroduodenal perforations of ulcerous origin in Senegal. Therapeutic considerations of apropos of 67 cases collected at the Surgical Clinic of the A. Le Dantec Hospital]. *Dakar Med*, 26(4), 397-403.
33. Yangni-Angate, Y., Cornet, L., Kebe, M., Le Guyader, A., Khoury, J., & Kanga, M. (1980). [Gastro-duodenal perforating ulcers. Therapeutic trend in African patients (a study of 80 cases recorded in Abidjan) (author's transl)]. *Med Trop (Mars)*, 40(2), 169-175.
34. Mabogunje, O. A., & Lawrie, J. H. (1979). Gastric ulcer in Zaria, Nigeria. *Trop Geogr Med*, 31(3), 359-363.
35. Ajao, O. G. (1979). Perforated duodenal ulcer in a tropical African population. *J Natl Med Assoc*, 71(3), 271-273.
36. Cooke, S. A. (1977). Perforated duodenal ulcer in the black population of Central Johannesburg. *Br J Surg*, 64(11), 791-794.
37. Brozin, I. H., Prajapat, D. K., & Blumsohn, D. (1977). Perforated duodenal ulcer in Black patients. *S Afr Med J*, 52(5), 186-188.
38. Tournier-Lasserre, C., Gerome, M., & Badarou. (1961). [Duodenal ulcers in black Africa. Apropos of 121 gastrectomies performed at Dahomey]. *Med Trop (Mars)*, 21, 554-564.
39. Kark, A. E. (1961). The incidence and pattern of peptic ulcer in Indians and Africans in Durban. *Gut*, 2(4), 363-369. doi:10.1136/gut.2.4.363
40. Snyder, C. A., & Alexander, M. J. (1963). PEPTIC ULCER IN AFRICA. *Arch Surg*, 87, 206-208.
41. Robert, H., Bouffard, A., & Gnanhui-David, M. (1964). [SURGICAL TREATMENT OF DUODENAL ULCER IN DAHOMEY (APROPOS OF 115 CASES)]. *Bull Soc Med Afr Noire Lang Fr*, 9, 544-552.
42. Yates, P. (1964). SURGICAL EXPERIENCE IN THE REPUBLIC OF CONGO, 1963: WITH SPECIAL REFERENCE TO PEPTIC ULCER. *Can Med Assoc J*, 91, 343-344.
43. Vovor, V. M., Odoulami, H., Goudote, E., Diop, A., & Izarn, R. (1972). [Treatment of perforated gastro-duodenal ulcers among Africans in Dakar (apropos of 58 observations)]. *Bull Soc Med Afr Noire Lang Fr*, 17(3), 481-487.
44. Solanke, T. F., & Kolawole, T. M. (1971). The evaluation of vagotomy and pyloroplasty in the treatment of duodenal ulcer in Nigerians: clinical and radiological study. *Br J Surg*, 58(3), 193-198.
45. Gogler, H. (1973). Peptic ulcer in rural Togo (West Africa). *Trop Geogr Med*, 25(4), 335-340.

46. Gouta, E. L., Dougaz, W., Khalfallah, M., Bouasker, I., & Dziri, C. (2018). Management of perforated duodenal peptic ulcer treated by suture. *Tunis Med*, 96(7), 424-429.
47. Bekele, A., Zemenfes, D., Kassa, S., Deneke, A., Taye, M., & Wondimu, S. (2018). *Patterns and Seasonal Variations of Perforated Peptic Ulcer Disease: Experience from Ethiopia* (Vol. 14).
48. Makhadi, S. (2017). Is laparoscopic graham patch safe in patients with perforated peptic ulcer disease who are delayed presenters with a high boey score? *Surgical Endoscopy and Other Interventional Techniques*, 31(2), S104-189.
49. Miller, J. R. (1966). Duodenal ulcer in Nairobi. *East Afr Med J*, 43(7), 259-263.
50. Solanke, T. F., & Itayemi, S. O. (1970). The management of duodenal ulceration in Western Nigeria. *East Afr Med J*, 47(10), 515-523.
51. Hancock, B. D. (1971). A review of gastro-duodenal pathology in Busoga District, Uganda. *East Afr Med J*, 48(3), 103-108.
52. Hamber, G., & von Bergen, M. (1971). Peptic ulcer in the Burundi Republic and Nile-Congo watershed. *Trop Geogr Med*, 23(3), 213-219.
53. Hamber, G., & Von Bergen, M. (1972). Anastomotic ulcer in Burundi. *East Afr Med J*, 49(6), 448-457.
54. Bremner, C. G. (1972). Duodenal ulcer in the Johannesburg urban African. *S Afr J Surg*, 10(3), 139-141.
55. Hamber, G., & Von Bergen, M. (1973). Gastric ulcer in tropical Africa. Clinical features and incidence in Burundi. *Trop Geogr Med*, 25(1), 1-7.
56. M Kolawole, T., & F Solanke, T. (1974). *Duodenal ulcers in Ibadan, Nigeria* (Vol. 25).
57. Sakhri, J., Sabri, Y., Skandrani, K., & Beltaifa, D. (2000). [Treatment of perforated duodenal ulcers]. *Tunis Med*, 78(8-9), 494-498.
58. Kafih, M., Fekak, H., el Idrissi, A., & Zerouali, N. O. (2000). [Perforated duodenal ulcer: laparoscopic treatment of perforation and ulcerous disease]. *Ann Chir*, 125(3), 242-246.
59. Anwar, M., Awad, A. T., Shebl, H., Sakr, M. F., & Gawish, Y. (1996). Risk factors in surgery of gastroduodenal ulcer disease in patients with schistosomal portal hypertension. *Int Surg*, 81(2), 126-129.
60. Schein, M., & Gecelter, G. (1989). APACHE II score in massive upper gastrointestinal haemorrhage from peptic ulcer: prognostic value and potential clinical applications. *Br J Surg*, 76(7), 733-736.
61. Schein, M., Saadia, R., Jamieson, J., & Decker, G. A. (1986). Perforated gastric ulcers. A retrospective study of 32 patients. *Am Surg*, 52(10), 551-554.
62. Adekunle, O. O. (1983). Duodenal ulcer in Nigerians. A clinical study of 200 patients. *J R Coll Surg Edinb*, 28(5), 308-312.
63. Ofili, O. P. (1992). Obstructed duodenal ulcer syndrome. Observations from Kano, Northern Nigeria. *Trop Geogr Med*, 44(1-2), 131-134.
64. Bank, S., Marks, I. N., & Louw, J. H. (1980). The long-term effects of vagotomy and drainage, parietal cell vagotomy and H2 receptor antagonists on duodenal ulcers and gastric function and structure. *S Afr Med J*, 57(16), 622-627.
65. Nyame, P. K. (1973). Haematemesis and melaena in Accra - a report of 124 cases. *Ghana Med J*, 12(4), 365-370.
66. Doctor, S. A. (1970). Peptic Ulceration at Ndola Central Hospital. *Medical Journal of Zambia*, 4(5), 151-153.
67. Moses, J. F., Hughes, C. D., Patel, P. B., Chao, T. E., Konneh, S. A., Jallabah, T. Y., . . . Hagander, L. E. (2015). Surgical outcomes for perforated peptic ulcer: A prospective case series at an academic hospital in Monrovia, Liberia. *African Journal of Emergency Medicine*, 5(2), 60-65. doi:<https://doi.org/10.1016/j.afjem.2014.11.002>
68. Nwashilli N.J, I. O. (2015). Peptic Ulcer Perforation: University of Benin Teaching Hospital Experience - Benin City, Nigeria. *Journal of Medicine and Biomedical Research*, 14(1), 95-103.
69. Ayadi, S., Daghfous, A., Saidani, A., Haddad, A., Magherbi, H., Jouini, M., . . . Ben Safta, Z. (2014). Predictive factors of Gastrointestinal motility Dysfunction after gastrojejunostomy for peptic ulcer stenosis. *Tunis Med*, 92(10), 601-603.
70. Ben Abid, S., Mzoughi, Z., Attaoui, M. A., Talbi, G., Arfa, N., Gharbi, L., & Khalfallah, M. T. (2014). [Laparoscopy for perforated duodenal ulcer : conversion and morbidity factors: retrospective study of 290 cases]. *Tunis Med*, 92(12), 732-736.
71. Konate, I., Dia, M. L., Cisse, M., Dieng, M., Ka, O., & Toure, C. T. (2010). [The surgical treatment results of ulcerous pyloro-duodenal stenosis: about 160 cases]. *Mali Med*, 25(1), 18-21.
72. du Plessis, D. J., Myburgh, J.A., Lawson, H.H., Bremner, C.G., Mieny. (1965). Experiences with the Treatment of Duodenal Ulceration in the Johannesburg Hospital. *South African Medical Journal*, 39(39), 918-922.
73. Schein, M., & D'Egidio, A. (1991). APACHE II scoring in surgical upper gastrointestinal emergencies. *Dig Dis*, 9(3), 156-164. doi:10.1159/000171301
74. Decker, G. A. (1970). The Management of Acute Gastroduodenal Bleeding. *South African Journal of Surgery*, 8(4), 65-69.
75. Stone, E. D. (1981). Peptic ulceration in Northern Tanzania. *J R Coll Surg Edinb*, 26(1), 36-38.
76. Reihmer, V. A. (1956). Peptic ulcers in Africans of the French Cameroons. *J Int Coll Surg*, 25(3 Part 1), 289-298.
77. Gillot, F., & Bigorie, G. (1960). [Gastroduodenal ulcers in children in Algeria. (Apropos of 19 cases)]. *Alger Medicale*, 64, 401-409.
78. Leutenegger, M., Illoul, G., Colonna, P., Ait Mesbah, M., Timsit, G., & Eddaikra, M. (1967). [Digestive tract hemorrhage of ulcerous origin (apropos of 408 cases)]. *Tunis Med*, 45(6), 387-395.
79. Kehila, M. (1988). [Type III ulcers (pre-pyloric ulcers and ulcers of the distal portion of the antrum). Apropos of 62 cases]. *Tunis Med*, 66(3), 195-197.
80. Kiire, C. F., Kitai, I., Sigola, L., & Ternouth, I. (1987). Upper gastrointestinal bleeding in an African setting. *J R Coll Physicians Lond*, 21(2), 107-110.
81. Davey, W. W., & Dickson, J. A. (1964). STOMAL ULCER IN NIGERIA. *J R Coll Surg Edinb*, 10, 300-306.
82. Nemery De Belleaux, J., Vanderick, F., & Louant, P. (1962). [Importance of gastroduodenal ulcers in digestive pathology in Ruanda]. *Ann Soc Belg Med Trop (1920)*, 42, 55-63.
83. Parodi, L., Le Bourthe, F., & Dicka, E. N. (1961). [Etiological, anatomical and therapeutic aspects of gastroduodenal surgical pathology in Central Africa (apropos of 64 cases)]. *J Chir (Paris)*, 82, 445-456.
84. Khan, A. A. (1958). Duodenal ulcer amongst Africans in Nairobi. *East Afr Med J*, 35(12), 679-684.
85. Bezes, & Zinsou. (1958). [Duodenal ulcer in an African from the Dakar region & its surgical treatment]. *Mem Acad Chir (Paris)*, 84(16-17), 488-491.
86. Hamzaoui, L., Bouassida, M., Ben Mansour, I., Medhioub, M., Ezzine, H., Touinsi, H., & Azouz, M. M. (2015). Balloon dilatation in patients with gastric outlet obstruction related to peptic ulcer disease. *Arab J Gastroenterol*, 16(3-4), 121-124. doi:10.1016/j.ajg.2015.07.004
87. Dogo, D., Yawe, T., & Gali, B. M. (1999). Gastric outlet obstruction in Maiduguri. *Afr J Med Med Sci*, 28(3-4), 199-201.
88. Rashid K. Adesunkanmi, A., A. Badmus, T., & Ogundoyin, O. (2003). *Causes and determinants of outcome of intestinal perforations in a semiurban African community* (Vol. 7).
89. Iwatt, A. R. (1988). Free small bowel perforation in an indigenous African population. *Int Surg*, 73(1), 50-53.
90. Levin, D. A., Watermeyer, G. A., Deetleefs, E., Metz, D. C., & Thomson, S. R. (2012). The efficacy of endoscopic therapy in bleeding peptic ulcer patients. *S Afr Med J*, 102(5), 290-293.
91. Chaabane, N., Ben Youssef, H., Ghedira, A., Loghmeri, H., Melki, W., Hellara, O., . . . Saffar, H. (2010). *Upper gastrointestinal bleeding epidemiology in Tunisia* (Vol. 40).

92. Schein, M., Gecelter, G., Freinkel, Z., & Gerding, H. (1990). APACHE II in emergency operations for perforated ulcers. *Am J Surg*, 159(3), 309-313.
93. Chalya, P. L., Mabula, J. B., Koy, M., McHembe, M. D., Jaka, H. M., Kabangila, R., . . . Gilyoma, J. M. (2011). Clinical profile and outcome of surgical treatment of perforated peptic ulcers in Northwestern Tanzania: A tertiary hospital experience. *World J Emerg Surg*, 6, 31. doi:10.1186/1749-7922-6-31
94. Gona, S. K., Alassan, M. K., Marcellin, K. G., Henriette, K. Y., Adama, C., Toussaint, A., . . . Francis, E. S. (2016). Postoperative Morbidity and Mortality of Perforated Peptic Ulcer: Retrospective Cohort Study of Risk Factors among Black Africans in Cote d'Ivoire. *Gastroenterol Res Pract*, 2016, 2640730. doi:10.1155/2016/2640730
95. Elnagib, E., Mahadi, S., & E Ahmed, M. (2012). *Perforated peptic ulcer in Khartoum* (Vol. 1).
